# Supplementary material
Source: publisher site journal article supplement (https://www.dovepress.com/article/supplementary_file/626233/626233%20-%20Revised%20Supplementary%20Appendix.docx)
Supplement: Supplementary file 1 [file 626233%20-%20Revised%20Supplementary%20Appendix.docx]

***Appendix***

***Appendix Table S1.*** *Distribution of isolates in different samples.*

| Group / Species | Urine | Stool | Blood | Secretions | Liquids | Swabs | Pus | Total n (%) |
| --- | --- | --- | --- | --- | --- | --- | --- | --- |
| **Gram-positive cocci** |  |  |  |  |  |  |  | **205 (100)** |
| *Staphylococcus aureus* | 8 | 0 | 22 | 1 | 4 | 6 | 58 | 99 (48,3) |
| *Enterococcus spp*. | 15 | 0 | 13 | 1 | 1 | 19 | 2 | 51 (24,9) |
| *Streptococcus spp*. | 7 | 0 | 12 | 0 | 5 | 6 | 6 | 36 (17,6) |
| Other Gram-positive cocci | 9 | 0 | 3 | 1 | 1 | 4 | 1 | 19 (9,3) |
| **Enterobacterales** |  |  |  |  |  |  |  | **1448 (100)** |
| *Escherichia coli* | 380 | 93 | 29 | 21 | 7 | 45 | 95 | 670 (46,3) |
| *Klebsiella pneumoniae* | 134 | 0 | 32 | 10 | 3 | 17 | 49 | 245 (16,9) |
| *Salmonella spp.* | 4 | 84 | 29 | 0 | 1 | 3 | 6 | 127 (8,8) |
| *Salmonella Typhi* | 3 | 18 | 64 | 0 | 1 | 1 | 3 | 90 (6,2) |
| *Enterobacter spp.* | 27 | 73 | 25 | 0 | 5 | 7 | 13 | 84 (5,8) |
| *Citrobacter freundii* | 10 | 34 | 1 | 0 | 0 | 3 | 4 | 52 (3,6) |
| *Proteus mirabilis* | 14 | 9 | 1 | 1 | 2 | 5 | 19 | 51 (3,5) |
| Other Enterobacterales | 60 | 8 | 18 | 2 | 5 | 6 | 30 | 129 (8,9) |
| **Non-fermenting BGNs** |  |  |  |  |  |  |  | **142 (100)** |
| *Pseudomonas spp.* | 36 | 3 | 6 | 0 | 1 | 7 | 20 | 73 (51,4) |
| *Acinetobacter spp.* | 13 | 0 | 11 | 1 | 4 | 3 | 16 | 48 (33,8) |
| *Pseudomonas aeruginosa* | 3 | 0 | 0 | 0 | 0 | 1 | 6 | 10 (7,0) |
| Other non-fermenting BGNs | 7 | 0 | 4 | 0 | 3 | 1 | 7 | 21 (14,8) |

**Note:** Values represent the number of isolates recovered from each specimen type. Percentages shown in the "Total" column indicate the proportion of each species within its respective bacterial group. *Other Gram-positive cocci*, *Other Enterobacterales*, and *Other non-fermenting Gram-negative bacilli* comprise species with low individual frequencies.

**Abbreviations:** BGNs, Gram-negative bacilli; spp., species.
